# Supplementary material for: Wide band-gap tuning in Sn-based hybrid perovskites through cation replacement: the FA1−xMAxSnBr3 mixed system
Source: Royal Society of Chemistry journal article supplement (doi:10.1039/c7ta01668a), 2017-01-01
Supplement: c7ta01668a1.pdf [file c7ta01668a1.pdf]

SUPPLEMENTARY INFORMATION

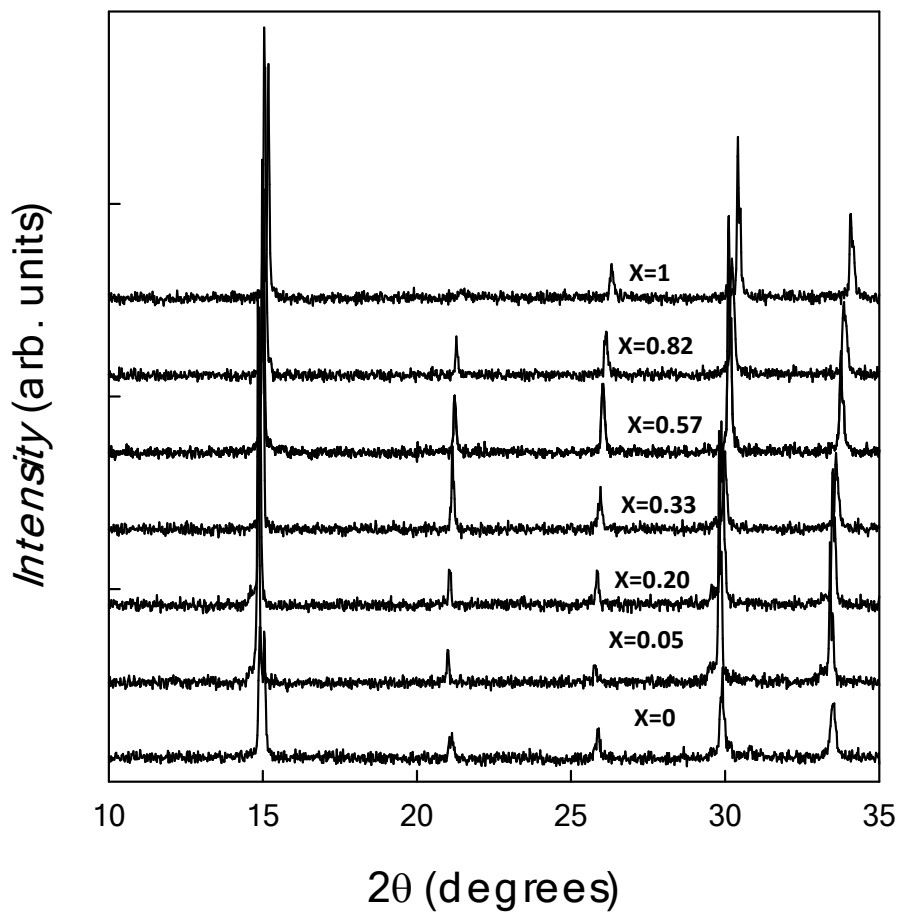

**Figure 1.** XRD patterns for the samples of the  $\text{FA}_{1-x}\text{MA}_x\text{SnBr}_3$  system in the  $10\text{-}35^\circ$  range. Patterns are vertically shifted to clarify viewing
